# Supplementary material for: Decontamination of 16S rRNA gene amplicon sequence datasets based on bacterial load assessment by qPCR
Source: PubMed Central journal article supplement (PMC4842273; doi:10.1186/s12866-016-0689-4), 2016-04-23

*Escherichia coli*

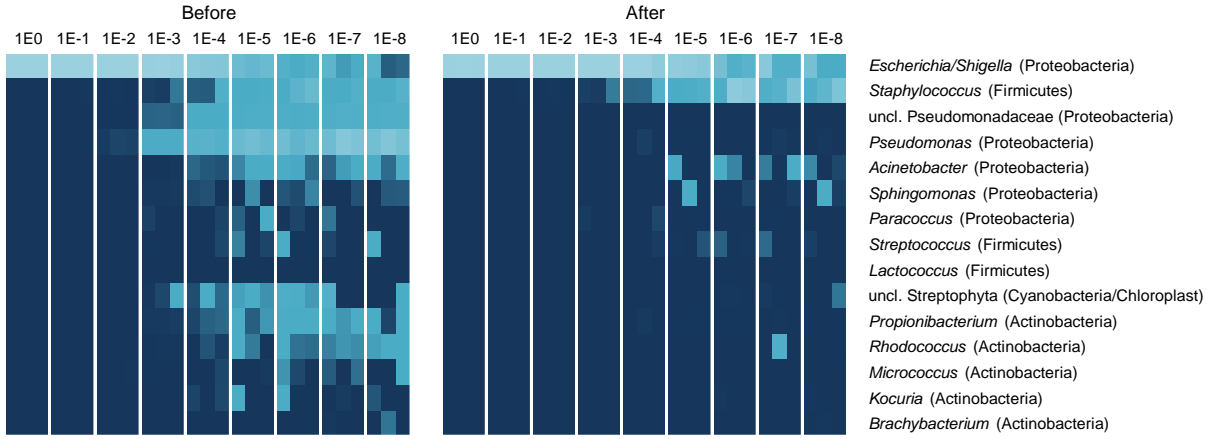

*Staphylococcus aureus*

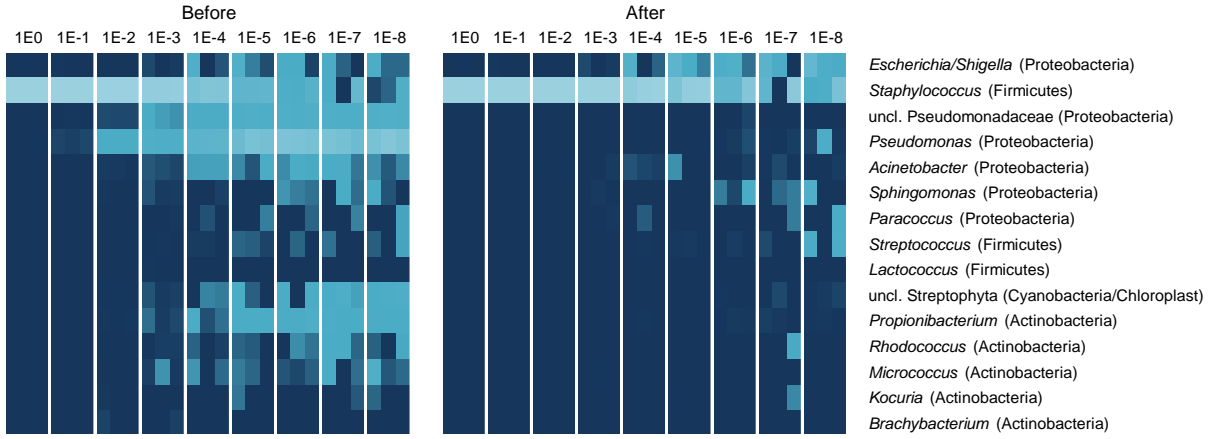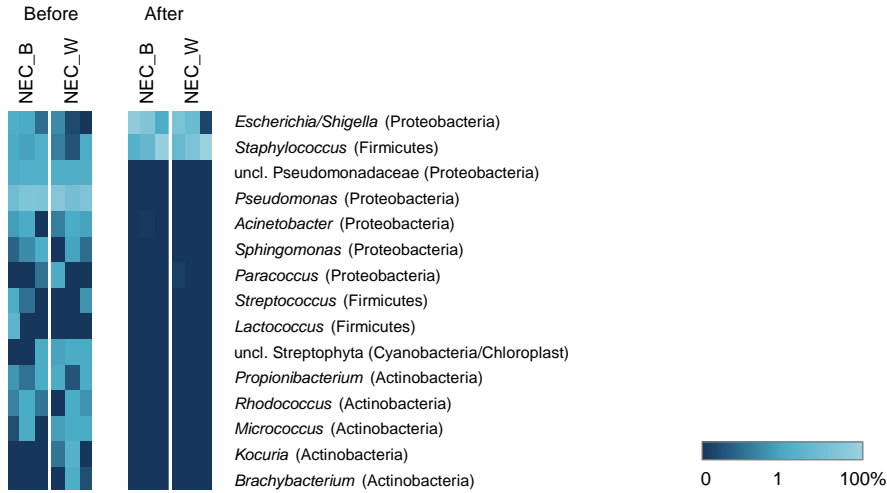

Supplement: 12866_2016_689_MOESM1_ESM.pdf [file 12866_2016_689_MOESM1_ESM.pdf]
